# Supplementary material for: The dietary freeze-dried fruit powder of Actinidia arguta ameliorates dextran sulphate sodium-induced ulcerative colitis in mice by inhibiting the activation of MAPKs
Source: Royal Society of Chemistry journal article supplement (doi:10.1039/c9fo00664h), 2019-01-01
Supplement: c9fo00664h1.pdf [file c9fo00664h1.pdf]

**Dietary freeze-dried fruit powder of *Actinidia arguta*  
ameliorates dextran sulphate sodium-induced ulcerative colitis  
in mice via inhibiting the activation of MAPKs**

Lian Lian <sup>a</sup>, Song Zhang<sup>b, c</sup>, Zhenlong Yu <sup>c</sup>, Huiqi Ge <sup>a</sup>, Shizhou Qi<sup>b</sup>, Xinxin Zhang<sup>b</sup>, Liping Long

<sup>b</sup>, Xin Xiong <sup>b</sup>, Donghai Chu<sup>a</sup>, Xiaochi Ma<sup>c</sup>, Xianzhe Li<sup>b\*</sup> and Huiyuan Gao <sup>b\*</sup>

<sup>a</sup> *School of Biopharmaceutical and Chemical Engineering, Liaoning Institute of Science and Technology, Benxi 117004, People's Republic of China*

<sup>b</sup> *School of Traditional Chinese Materia Medica, Shenyang Pharmaceutical University, Shenyang 110016, People's Republic of China*

<sup>c</sup> *College of Pharmacy, Academy of Integrative Medicine, Dalian Medical University, Dalian, 116044, People's Republic of China*

---

\* Correspondence: Huiyuan Gao, School of Traditional Chinese Materia Medica, Shenyang Pharmaceutical University, Shenyang, China. E-mail: [sypugaohy@163.com](mailto:sypugaohy@163.com); Fax: +862423986460, Tel: +862423986481.

\* Correspondence: Xianzhe Li, School of Traditional Chinese Materia Medica, Shenyang Pharmaceutical University, Shenyang, China. E-mail: [lixianzhe1989@163.com](mailto:lixianzhe1989@163.com).

**Fig S1** Effects of FAA on the body weight changes of mice

**Fig S2** The cell viability with the designed extract content with or without LPS treatment

**Table S1** The body weight of mice from day 1 to day 10 (Mean  $\pm$  SD, n=10)

**Table S2** The percentage changes in body weight of mice (Mean  $\pm$  SD, n=10)

**Table S3.** The pharmacodynamic parameters (Mean  $\pm$  SD, n=10)

**Table S4.** The cell viability (%) with the designed extract content with or without LPS treatment (Mean  $\pm$  SD, n=3)

**Table S5.** The parameters of inflammatory response and oxidative stress levels (Mean  $\pm$  SD, n=3)

**Table S6.** The NO generation and iNOS expression in RAW 264.7 macrophages (Mean  $\pm$  SD, n=3)

**Table S7.** The relative MAPK protein expressions in mice colon (% of Control, Mean  $\pm$  SD, n=3)

**Table S8.** The relative MAPK protein expressions in RAW 264.7 cells (% of LPS, Mean  $\pm$  SD, n=3)

**Fig S1** Effects of FAA on the body weight changes of mice

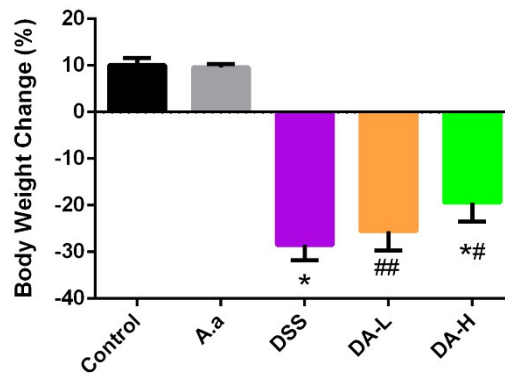

Notice: \*,  $p < 0.01$  versus Control; \*#,  $p < 0.01$  versus DSS; ##,  $p > 0.05$  versus DSS.

**Fig S2** The cell viability with the designed extract content with or without LPS treatment

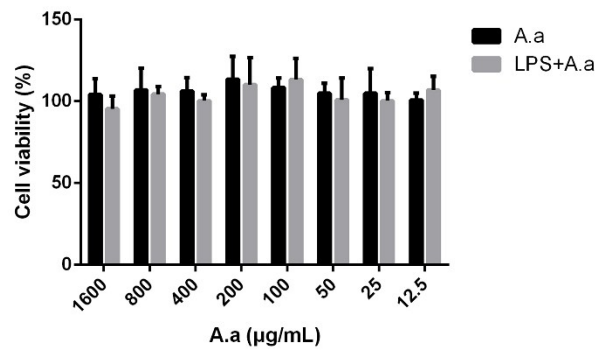

**Table S1 (Data for Fig 1A)**

**Table S1** The body weight of mice from day 1 to day 10 (Mean  $\pm$  SD, n=10)

| Group   | Body weight of mice (g) |                  |                  |                  |                  |
|---------|-------------------------|------------------|------------------|------------------|------------------|
|         | 1d                      | 2d               | 3d               | 4d               | 5d               |
| Control | 21.86 $\pm$ 0.86        | 22.00 $\pm$ 0.59 | 22.33 $\pm$ 0.84 | 22.80 $\pm$ 1.06 | 23.66 $\pm$ 1.10 |
| A.a     | 21.23 $\pm$ 0.46        | 21.78 $\pm$ 0.63 | 22.46 $\pm$ 0.84 | 23.00 $\pm$ 1.02 | 23.20 $\pm$ 1.07 |
| DSS     | 21.88 $\pm$ 0.77        | 22.16 $\pm$ 1.35 | 22.68 $\pm$ 1.22 | 22.34 $\pm$ 1.06 | 21.98 $\pm$ 1.28 |
| DA-L    | 21.97 $\pm$ 0.90        | 22.37 $\pm$ 0.88 | 21.86 $\pm$ 0.91 | 21.47 $\pm$ 1.21 | 20.67 $\pm$ 1.37 |
| DA-H    | 21.43 $\pm$ 0.65        | 22.70 $\pm$ 0.75 | 22.05 $\pm$ 1.07 | 21.67 $\pm$ 1.18 | 21.25 $\pm$ 1.58 |

**continue**

| Group   | Body weight of mice (g) |                  |                  |                  |                  |
|---------|-------------------------|------------------|------------------|------------------|------------------|
|         | 6d                      | 7d               | 8d               | 9d               | 10d              |
| Control | 23.73 $\pm$ 0.98        | 23.93 $\pm$ 1.34 | 24.04 $\pm$ 1.09 | 24.08 $\pm$ 1.09 | 24.38 $\pm$ 1.11 |
| A.a     | 23.40 $\pm$ 0.65        | 23.70 $\pm$ 0.78 | 23.99 $\pm$ 0.89 | 24.10 $\pm$ 0.80 | 24.23 $\pm$ 0.62 |
| DSS     | 21.07 $\pm$ 1.26        | 19.87 $\pm$ 1.93 | 18.37 $\pm$ 2.20 | 17.07 $\pm$ 2.14 | 15.67 $\pm$ 2.20 |
| DA-L    | 20.33 $\pm$ 1.75        | 19.44 $\pm$ 1.76 | 18.13 $\pm$ 1.56 | 17.24 $\pm$ 1.42 | 16.48 $\pm$ 1.48 |
| DA-H    | 20.47 $\pm$ 1.29        | 19.63 $\pm$ 1.37 | 18.46 $\pm$ 1.42 | 17.67 $\pm$ 1.27 | 17.3 $\pm$ 1.26  |

**Table S2 (Data for Fig S1)****Table S2** The percentage changes in body weight of mice (Mean  $\pm$  SD, n=10)

|                            | Group              |                   |                     |                      |                      |
|----------------------------|--------------------|-------------------|---------------------|----------------------|----------------------|
|                            | Control            | A.a               | DSS                 | DA-L                 | DA-H                 |
| Changes of body weight (%) | + 10.06 $\pm$ 1.51 | + 9.58 $\pm$ 0.73 | - 28.45 $\pm$ 3.36* | - 25.51 $\pm$ 4.15## | - 19.44 $\pm$ 4.04*# |

Notice: \*,  $p < 0.01$  versus Control; \*#,  $p < 0.01$  versus DSS; ##,  $p > 0.05$  versus DSS.

+, increase of body weight compared with the first day;

-, decrease of body weight compared with the first day.

Changes of body weight (%) = (the mouse body weight of day 10 – the mouse body weight of day 1) / the mouse body weight of day 1  $\times$  100%.

**Table S3 (Data for Fig 1B, D, E and F)**

**Table S3.** The pharmacodynamic parameters (Mean  $\pm$  SD, n=10)

|                                   | Group            |                  |                   |                    |                    |
|-----------------------------------|------------------|------------------|-------------------|--------------------|--------------------|
|                                   | Control          | A.a              | DSS               | DA-L               | DA-H               |
| DAI score                         | 0.04 $\pm$ 0.12  | 0.04 $\pm$ 0.12  | 3.27 $\pm$ 0.47*  | 2.97 $\pm$ 0.48##  | 2.40 $\pm$ 0.68*#  |
| Colon length (cm)                 | 8.76 $\pm$ 0.81  | 8.74 $\pm$ 0.81  | 5.15 $\pm$ 0.69*  | 5.78 $\pm$ 0.87##  | 6.74 $\pm$ 0.69#   |
| Colon weight/length ratio (mg/cm) | 35.56 $\pm$ 2.79 | 34.48 $\pm$ 4.13 | 46.06 $\pm$ 6.96* | 40.26 $\pm$ 2.79## | 31.27 $\pm$ 3.17*# |
| Spleen index (mg/g)               | 4.27 $\pm$ 0.27  | 4.03 $\pm$ 0.30  | 6.53 $\pm$ 0.28*  | 6.15 $\pm$ 0.91##  | 5.07 $\pm$ 0.32*#  |

Notice: \* $p < 0.01$  versus Control group; \*# $p < 0.01$  versus DSS group; # $p < 0.05$  versus DSS group; ## $p > 0.05$  versus DSS group.

**Table S4 (Data for Fig S2)**

**Table S4.** The cell viability (%) with the designed extract content with or without LPS treatment (Mean  $\pm$  SD, n=3)

| Concentration ( $\mu$ g/mL) | A.a               | A.a + LPS        |
|-----------------------------|-------------------|------------------|
| 1600                        | 104.16 $\pm$ 9.63 | 95.43 $\pm$ 7.91 |

|      |              |              |
|------|--------------|--------------|
| 800  | 106.89±13.46 | 104.43±4.56  |
| 400  | 106.34±8.26  | 100.35±3.59  |
| 200  | 113.51±13.87 | 110.15±16.66 |
| 100  | 108.46±5.76  | 113.27±12.91 |
| 50   | 104.91±6.17  | 100.99±13.28 |
| 25   | 104.96±15.11 | 100.35±4.92  |
| 12.5 | 100.82±4.20  | 106.95±8.19  |

**Table S5 (Data for Fig 3A, B, C,D and E)**

**Table S5.** The parameters of inflammatory response and oxidative stress levels (Mean ± SD, n=3)

|                             | Group       |            |               |               |               |
|-----------------------------|-------------|------------|---------------|---------------|---------------|
|                             | Control     | A.a        | DSS           | DA-L          | DA-H          |
| MPO (U/g)                   | 1.89±0.67   | 2.08±0.69  | 12.35±2.17*   | 7.14±1.18*#   | 5.72±1.56*#   |
| MDA<br>(nmol/mg<br>protein) | 1.72±0.52   | 1.67±0.24  | 5.84±1.05*    | 4.24±0.53*    | 3.18±0.72*#   |
| SOD (U/ml)                  | 65.32±5.03  | 62.79±4.26 | 54.95±1.20*   | 58.65±2.63#   | 63.42±3.53*#  |
| GSH (μmol/g<br>protein)     | 4.72±0.94   | 5.18±1.08  | 1.05±0.81*    | 1.28±0.48*    | 1.61±0.81*    |
| IL-6 (pg/ml)                | 24.86±3.55  | 25.26±2.61 | 82.30±8.38*   | 59.11±6.47*#  | 46.57±4.73*#  |
| IL-1β (pg/ml)               | 25.72±4.37  | 23.63±2.97 | 82.47±4.46*   | 43.39±4.87*#  | 34.88±3.78*#  |
| TNF-α (pg/ml)               | 158.6±11.83 | 156.5±8.31 | 257.57±17.42* | 212.47±8.72*# | 186.23±8.43*# |

Notice: \* $p < 0.01$  versus Control group; # $p < 0.05$  versus Control group; \*# $p < 0.01$  versus DSS group.

**Table S6 (Data for Fig 4A, B and D)****Table S6.** The NO generation and iNOS expression in RAW 264.7 macrophages(Mean  $\pm$  SD, n=3)

|                                                        | Group                   |                          |                           |                            |                           |                         |
|--------------------------------------------------------|-------------------------|--------------------------|---------------------------|----------------------------|---------------------------|-------------------------|
|                                                        | Control                 | LPS                      | LA-L                      | LA-M                       | LA-H                      | A.a                     |
| Extracellular<br>NO content<br>( $\mu$ M)              | 4.38 $\pm$ 2.22         | 35.01 $\pm$ 3.70*        | 23.98 $\pm$ 1.58*#        | 21.55 $\pm$ 1.84*#         | 11.07 $\pm$ 1.53*#        | 5.89 $\pm$ 2.38         |
| Intracellular<br>NO probe<br>fluorescence<br>intensity | 3957.32 $\pm$<br>302.54 | 8931.16 $\pm$<br>678.16* | 7911.63 $\pm$<br>589.75## | 6775.00 $\pm$<br>1032.54*# | 5779.01 $\pm$<br>865.39*# | 4013.02 $\pm$<br>256.41 |
| iNOS/GAPDH                                             | 10.06 $\pm$ 3.95        | 100*                     | 41.56 $\pm$ 6.12*#        | 33.74 $\pm$ 6.62*#         | 21.72 $\pm$ 7.64*#        | 14.91 $\pm$ 8.94        |

Notice: \*  $p < 0.01$  versus Control group; \*#  $p < 0.01$  versus LPS group; ##  $p > 0.05$  versus LPS group.**Table S7 (Data for Fig 5B, C and D)****Table S7.** The relative MAPK protein expressions in mice colon(% of Control, Mean  $\pm$  SD, n=3)

|           | Group   |                    |                      |                      |                       |
|-----------|---------|--------------------|----------------------|----------------------|-----------------------|
|           | Control | A.a                | DSS                  | DA-L                 | DA-H                  |
| p-p38/p38 | 100     | 114.47 $\pm$ 23.55 | 748.43 $\pm$ 104.66* | 449.68 $\pm$ 142.21# | 376.37 $\pm$ 139.36*# |
| p-JNK/JNK | 100     | 111.61 $\pm$ 23.37 | 283.23 $\pm$ 53.77*  | 234.68 $\pm$ 36.09## | 158.27 $\pm$ 16.78*#  |

|           |     |              |               |                |                |
|-----------|-----|--------------|---------------|----------------|----------------|
| p-ERK/ERK | 100 | 107.36±21.92 | 265.60±67.43* | 213.20±31.64## | 221.45±59.84## |
|-----------|-----|--------------|---------------|----------------|----------------|

Notice: \* $p < 0.01$  versus Control group; \*# $p < 0.01$  versus DSS group; # $p < 0.05$  versus DSS group; ## $p > 0.05$  versus DSS group.

**Table S8 (Data for Fig 5F, G and H)**

**Table S8.** The relative MAPK protein expressions in RAW 264.7 cells

(% of LPS, Mean ± SD, n=3)

|           | Group       |     |                |              |              |            |
|-----------|-------------|-----|----------------|--------------|--------------|------------|
|           | Control     | LPS | LA-L           | LA-M         | LA-H         | A.a        |
| p-p38/p38 | 5.70±2.56*  | 100 | 52.40±18.72*   | 40.82±11.06* | 21.07±15.23* | 6.10±6.23  |
| p-JNK/JNK | 26.05±7.45* | 100 | 122.16±17.39## | 54.37±10.14* | 40.11±4.45*  | 14.17±3.39 |
| p-ERK/ERK | 6.56±1.40*  | 100 | 91.34±8.93##   | 56.13±1.42*  | 29.75±9.77*  | 5.64±2.06  |

Notice: \* $p < 0.01$  versus LPS group; ## $p > 0.05$  versus LPS group.
